# Supplementary material for: Efficient Production of Multi-Layer Graphene from Graphite Flakes in Water by Lipase-Graphene Sheets Conjugation
Source: PubMed Central journal article supplement (PMC6781021; doi:10.3390/nano9091344), 2019-09-19
Supplement: nanomaterials-09-01344-s001.pdf [file nanomaterials-09-01344-s001.pdf]

## SUPPLEMENTARY INFORMATION

# Efficient production of multi-layer graphene from graphite flakes in water by lipase-graphene sheets conjugation

Noelia Losada-Garcia <sup>1</sup>, Angel Berenguer-Murcia <sup>2</sup>, Diego Cazorla-Amoros <sup>2</sup> and Jose M. Palomo <sup>1,\*</sup>

<sup>1</sup> Department of Biocatalysis. Institute of Catalysis (CSIC). Marie Curie 2. Cantoblanco. Campus UAM, 28049 Madrid, Spain; n.losada@csic.es

<sup>2</sup> Instituto Universitario de Materiales y Departamento de Química Inorgánica, Universidad de Alicante, Apartado 99, San Vicente del Raspeig, E-03080 Alicante, Spain; a.berenguer@ua.es, cazorla@ua.es.

\* Correspondence: josempalomo@icp.csic.es; Tel.: +34915854768

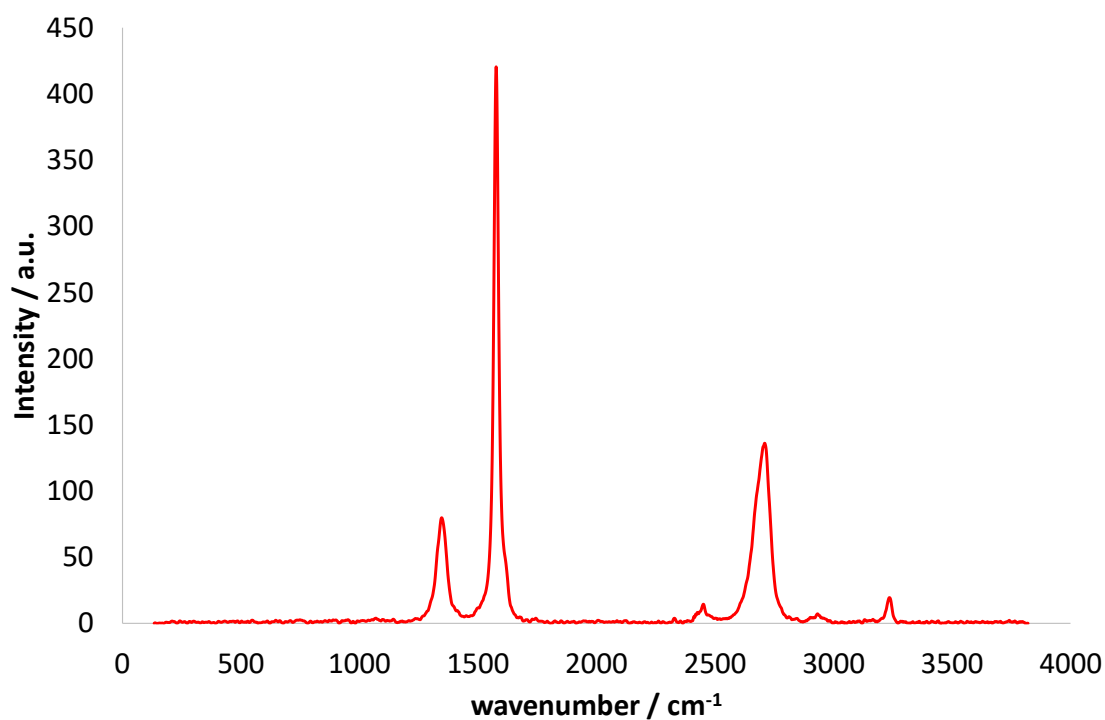

Figure 1. Raman spectra of the parent graphite used in this manuscript.

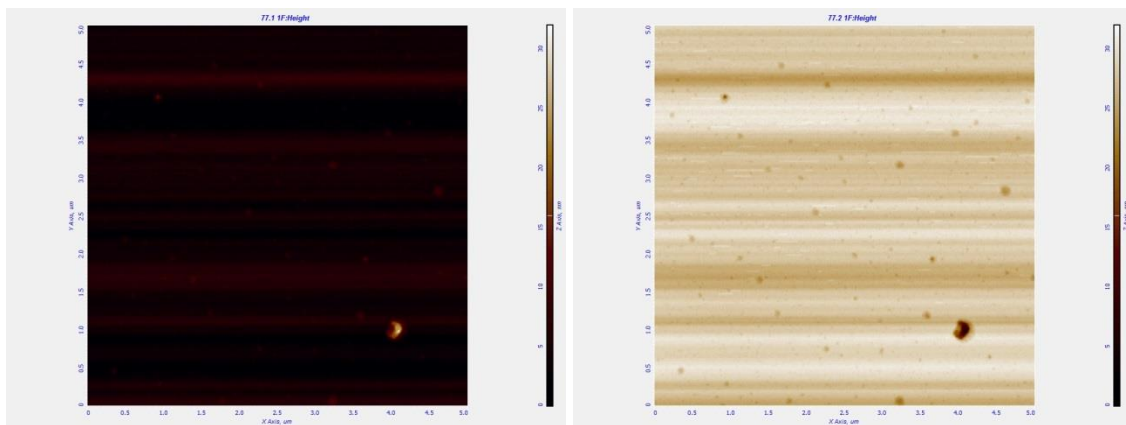

**Figure 2.** Representative AFM image (left) and inverse image (right) obtained for sample **biographene-1-TLL**.
